# Supplementary material for: Not All Injuries Are the Same: Different Patterns in Sports Injuries and Their Psychosocial Correlates
Source: MDPI journal article supplement (doi:10.3390/sports11120237), 2023-12-01
Supplement: s1 [file s1]

**Supplement Table S1.** Assessed demographics, sports- and injury-related information and used questionnaires.

|                            |                                                                                                                                                                                                                                                                                                                                                                                                                                                                                                                                                                                                                                                                                                                                                                                                                                                  |
|----------------------------|--------------------------------------------------------------------------------------------------------------------------------------------------------------------------------------------------------------------------------------------------------------------------------------------------------------------------------------------------------------------------------------------------------------------------------------------------------------------------------------------------------------------------------------------------------------------------------------------------------------------------------------------------------------------------------------------------------------------------------------------------------------------------------------------------------------------------------------------------|
| <b>Demographic data</b>    | <ul style="list-style-type: none"> <li>• Sex</li> <li>• Age</li> <li>• Graduation level</li> <li>• Occupation</li> <li>• Study course</li> <li>• Semesters of study</li> </ul>                                                                                                                                                                                                                                                                                                                                                                                                                                                                                                                                                                                                                                                                   |
| <b>Sports-related data</b> | <ul style="list-style-type: none"> <li>• Sport</li> <li>• Type of sports</li> <li>• Training sessions in main sport</li> <li>• Additional training sessions</li> <li>• Hours of training per week</li> <li>• Competition participation</li> <li>• Competition level</li> <li>• Performance level</li> <li>• Squad level</li> <li>• Number of years conducting the sport</li> <li>• Seasonal phase</li> <li>• Part of national team</li> <li>• Experience with mental training</li> </ul>                                                                                                                                                                                                                                                                                                                                                         |
| <b>Injury-related data</b> | <ul style="list-style-type: none"> <li>• Current injury status</li> <li>• <i>Description of injury</i></li> <li>• Frequency within the last 12 months</li> <li>• <i>Setting of current or past injury</i></li> <li>• <i>Date of current or past injury</i></li> <li>• <i>Cause of current or past injury</i></li> <li>• Severity of current or past injury</li> <li>• Medical treatment of current or past injury</li> <li>• <i>Drug treatment of current or past injury</i></li> <li>• Rehabilitation measures of current or past injury</li> <li>• <i>Achievement of pre-injury performance level (only past injuries)</i></li> <li>• <i>Recovery time (only past injuries)</i></li> <li>• <i>Consequences of current or past injury</i></li> <li>• Chronicity</li> </ul>                                                                      |
| <b>Psychosocial data</b>   | <ul style="list-style-type: none"> <li>• Life Events (SRRS)</li> <li>• Perceived Stress (PSQ)</li> <li>• <i>Depression and Anxiety (STADI)</i></li> <li>• <i>Worry (PSWQ)</i></li> <li>• <i>Mental Health (GHQ)</i></li> <li>• <i>Fatigue (FAS)</i></li> <li>• Competition anxiety (WAI-T)</li> <li>• Locus of Control (IE-4)</li> <li>• <i>Rumination (PTQ)</i></li> <li>• Mindfulness (MAAS)</li> <li>• Social Support (FSoz-KU14)</li> <li>• <i>Burnout (ABQ-D)</i></li> <li>• <i>Sports-related rumination (SCRS)</i></li> <li>• Self-Compassion (SCS-D short scale)</li> <li>• Fear of (re-)injury (TSK)</li> <li>• Athletic Identity (AIMS-D)</li> <li>• Willingness to spend (EESS)</li> <li>• Self-Efficacy (ESES)</li> <li>• Coping behavior (Brief COPE)</li> <li>• Resilience (BRS)</li> <li>• Sense of Coherence (SOC-L9)</li> </ul> |

**Note.** Information and questionnaires **not** used in the data analyses of the present study are italic.
